# Supplementary material
Source: MDPI journal article supplement (https://www.mdpi.com/2072-4292/10/8/1237)
Supplement: s1 [file s1]

Article

# Detection of Methane Plumes Using Airborne Midwave Infrared (3–5 $\mu\text{m}$ ) Hyperspectral Data

Rebecca Del’Papa Moreira Scafutto, Carlos Roberto de Souza Filho

## Supplementary Material

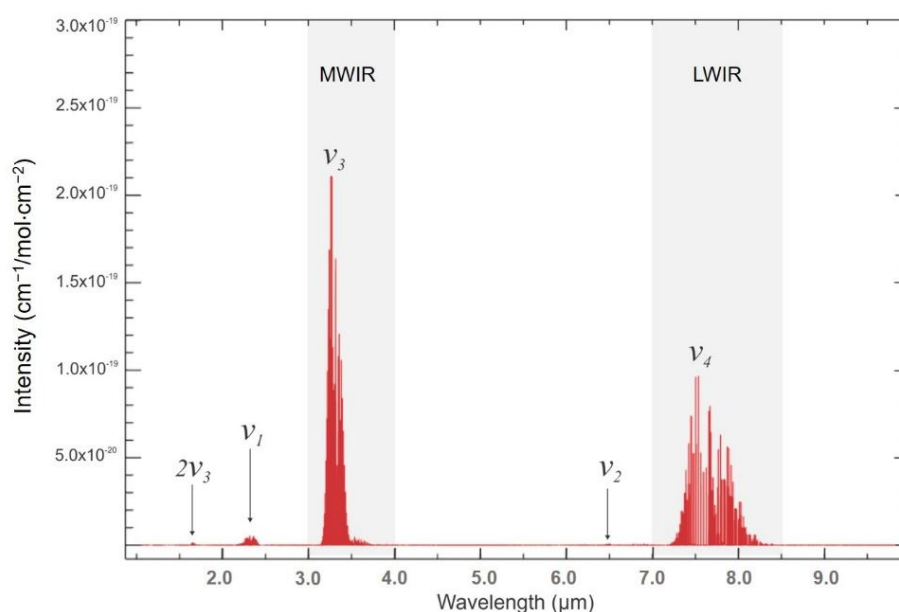

**Figure S1.** HITRAN spectral lines of methane ( $\text{CH}_4$ ) at a temperature of 296 K [18]. The location of fundamental vibrations is indicated in the plot as  $\nu_1$ ,  $\nu_2$ ,  $\nu_3$ ,  $\nu_4$ .

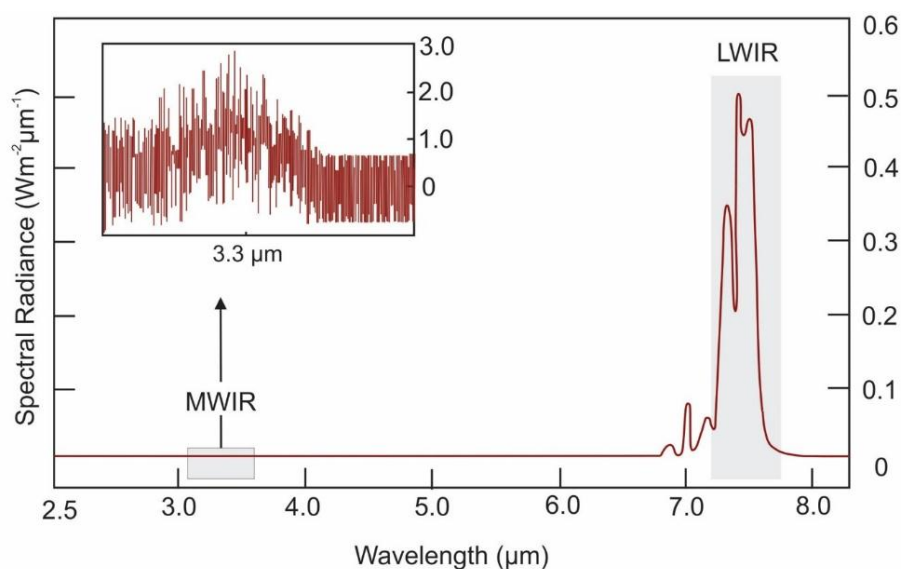

**Figure S2.** Methane self-emission spectrum acquired under ambient conditions (298 K/25°C) with the HYPER-CAM MWE (1.5–5  $\mu\text{m}$ ) and the HYPER-CAM METHANE (7.4–8.3  $\mu\text{m}$ ) hyperspectral cameras operated by TELOPS INC. (Quebec City, QC – Canada - <http://telops.com/products/hyperspectral-cameras>). Both cameras have user-selectable spectral resolution up to  $0.25\text{ cm}^{-1}$  and a NESR\* ( $\text{nw}/\text{cm}^2\text{ s cm}^{-1}$ ) of 7 and 6 for MWIR and LWIR, respectively (\* noise equivalent spectral radiance).

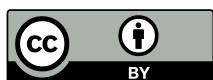

© 2018 by the authors. Submitted for possible open access publication under the terms and conditions of the Creative Commons Attribution (CC BY) license (<http://creativecommons.org/licenses/by/4.0/>).
